# Supplementary material
Source: publisher figshare collection journal article supplement (https://diabetesjournals.figshare.com/articles/dataset/_/20126132)
Supplement: Supplementary file 1 [file 1]

**Table S1 survival rate of T1D mice in different groups and genders**

|                                             | <b>Male (death/total)</b> | <b>Female (death/total)</b> |
|---------------------------------------------|---------------------------|-----------------------------|
| <b>WT T1D</b>                               | <b>23/39</b>              | <b>12/12</b>                |
| <b>Integrin <math>\alpha 5/2</math> T1D</b> | <b>18/29</b>              | <b>9/11</b>                 |
| <b>PDE4D5<sup>mut</sup> T1D</b>             | <b>26/33</b>              | <b>11/11</b>                |

**Table S2. Morphological and mechanical data (mean  $\pm$  SEM) for the right common carotid artery from citric buffer- (Ctrl) or STZ- (DB) injected WT and integrin  $\alpha 5/2$  mice. Pressure-dependent values were calculated at 120 mmHg.**

|                                                                   | <b>Biaxial biomechanical properties - 120 mmHg</b> |                                   |                                                       |                                                     |
|-------------------------------------------------------------------|----------------------------------------------------|-----------------------------------|-------------------------------------------------------|-----------------------------------------------------|
|                                                                   | <b>WT - Ctrl</b><br><b>n = 6</b>                   | <b>WT - DB</b><br><b>n = 6</b>    | <b><math>\alpha 5/2</math> - Ctrl</b><br><b>n = 8</b> | <b><math>\alpha 5/2</math> - DB</b><br><b>n = 5</b> |
| <b>Unloaded dimensions</b>                                        |                                                    |                                   |                                                       |                                                     |
| <b>Wall Thickness (<math>\mu\text{m}</math>)</b>                  | <b>78 <math>\pm</math> 3.9</b>                     | <b>79 <math>\pm</math> 1.4</b>    | <b>79 <math>\pm</math> 2.2</b>                        | <b>76 <math>\pm</math> 2.0</b>                      |
| <b>Outer Diameter (<math>\mu\text{m}</math>)</b>                  | <b>470 <math>\pm</math> 18</b>                     | <b>417 <math>\pm</math> 25</b>    | <b>440 <math>\pm</math> 13</b>                        | <b>397 <math>\pm</math> 18</b>                      |
| <b>Axial Length (mm)</b>                                          | <b>4.00 <math>\pm</math> 0.37</b>                  | <b>4.15 <math>\pm</math> 0.09</b> | <b>4.14 <math>\pm</math> 0.18</b>                     | <b>4.47 <math>\pm</math> 0.10</b>                   |
| <b>Loaded dimensions</b>                                          | <b>P = 120</b>                                     | <b>P = 120</b>                    | <b>P = 120</b>                                        | <b>P = 120</b>                                      |
| <b>Outer Diameter (<math>\mu\text{m}</math>)</b>                  | <b>706 <math>\pm</math> 24.9</b>                   | <b>640 <math>\pm</math> 40.1</b>  | <b>680 <math>\pm</math> 12.6</b>                      | <b>633 <math>\pm</math> 19.5</b>                    |
| <b>Wall Thickness (<math>\mu\text{m}</math>)</b>                  | <b>22 <math>\pm</math> 0.9</b>                     | <b>22 <math>\pm</math> 1.2</b>    | <b>22 <math>\pm</math> 0.5</b>                        | <b>20 <math>\pm</math> 0.7</b>                      |
| <b>Inner Radius (<math>\mu\text{m}</math>)</b>                    | <b>330 <math>\pm</math> 13.0</b>                   | <b>298 <math>\pm</math> 20.3</b>  | <b>318 <math>\pm</math> 6.6</b>                       | <b>297 <math>\pm</math> 9.4</b>                     |
| <b>In vivo Circ. Stretch (<math>\lambda_\theta</math>)</b>        | <b>1.75 <math>\pm</math> 0.05</b>                  | <b>1.84 <math>\pm</math> 0.10</b> | <b>1.84 <math>\pm</math> 0.08</b>                     | <b>1.92 <math>\pm</math> 0.07</b>                   |
| <b>in vivo Axial Stretch (<math>\lambda_z^{\text{iv}}</math>)</b> | <b>1.99 <math>\pm</math> 0.01</b>                  | <b>1.94 <math>\pm</math> 0.03</b> | <b>1.95 <math>\pm</math> 0.03</b>                     | <b>1.99 <math>\pm</math> 0.02</b>                   |

|                                                        |                     |               |                     |               |                     |               |                     |               |
|--------------------------------------------------------|---------------------|---------------|---------------------|---------------|---------------------|---------------|---------------------|---------------|
| <b>Systolic<br/>Cauchy<br/>Stresses<br/>(kPa)</b>      |                     |               |                     |               |                     |               |                     |               |
| <b>Circ., <math>\sigma_{\theta}</math></b>             | <b>239</b>          | <b>± 15.8</b> | <b>218</b>          | <b>± 22.4</b> | <b>232</b>          | <b>± 9.3</b>  | <b>239</b>          | <b>± 8.5</b>  |
| <b>Axial, <math>\sigma_z</math></b>                    | <b>283</b>          | <b>± 6.5</b>  | <b>291</b>          | <b>± 30.8</b> | <b>254</b>          | <b>± 11.8</b> | <b>301</b>          | <b>± 19.0</b> |
| <b>Systolic<br/>Linearized<br/>Stiffness<br/>(MPa)</b> |                     |               |                     |               |                     |               |                     |               |
| <b>Circ.,<math>C_{\theta\theta\theta\theta}</math></b> | <b>1.89</b>         | <b>± 0.27</b> | <b>1.88</b>         | <b>± 0.28</b> | <b>1.79</b>         | <b>± 0.13</b> | <b>1.44</b>         | <b>± 0.13</b> |
| <b>Axial, <math>C_{zzzz}</math></b>                    | <b>2.08</b>         | <b>± 0.07</b> | <b>2.50</b>         | <b>± 0.19</b> | <b>1.97</b>         | <b>± 0.08</b> | <b>2.02</b>         | <b>± 0.20</b> |
| <b>Distensibility<br/>(1/MPa)</b>                      | <b>21.50 ± 3.85</b> |               | <b>19.76 ± 3.60</b> |               | <b>20.02 ± 1.58</b> |               | <b>28.60 ± 3.25</b> |               |
| <b>Systolic<br/>Stored<br/>Energy<br/>(kPa)</b>        | <b>82 ± 2.5</b>     |               | <b>81 ± 10.8</b>    |               | <b>73 ± 3.0</b>     |               | <b>87 ± 3.7</b>     |               |
